# Supplementary material for: Community Analysis of Root- and Tuber-Associated Bacteria in Field-Grown Potato Plants Harboring Different Resistance Levels against Common Scab
Source: PubMed Central journal article supplement (PMC4676553; doi:10.1264/jsme2.me15109), 2015-12-09
Supplement: 30_301_s1.pdf [file 30_301_s1.pdf]

Supplementary Table 1. Phylogenetic compositions of clone libraries of 16S rRNA gene sequences for root- and tuber-associated bacteria of 8 potato genotypes

| Phylogenetic composition <sup>a</sup> | Clone libraries |     |     |       |      |      |     |       |     |     |     |      |     |        |        |        |
|---------------------------------------|-----------------|-----|-----|-------|------|------|-----|-------|-----|-----|-----|------|-----|--------|--------|--------|
|                                       | Root            |     |     |       |      |      |     | Tuber |     |     |     |      |     |        |        |        |
|                                       | R1 <sup>b</sup> | R2  | R3  | M1    | M2   | S1   | S2  | S3    | R1  | R2  | R3  | M1   | M2  | S1     | S2     | S3     |
| Actinobacteria                        | 11.5            | 9.1 | 8.7 | 3.7** | 11.8 | 8.6  | 6.1 | 9.6   | 3.0 | 3.8 | 2.3 | 10.3 | 8.7 | 15.2** | 13.6** | 23.2** |
| Actinobacteria                        | 11.5            | 9.1 | 8.7 | 3.7** | 11.8 | 8.6  | 6.1 | 9.6   | 3.0 | 3.8 | 2.3 | 10.3 | 8.7 | 15.2** | 13.6** | 23.2** |
| Actinobacteridae                      | 11.5            | 9.1 | 8.7 | 3.7** | 11.8 | 8.6  | 6.1 | 9.6   | 3.0 | 3.8 | 2.3 | 10.3 | 8.7 | 15.2** | 13.6** | 23.2** |
| Actinomycetales                       | 11.5            | 9.1 | 8.1 | 3.7** | 11.8 | 8.6  | 6.1 | 9.0   | 3.0 | 3.8 | 2.3 | 9.3  | 8.7 | 15.2** | 13.6** | 23.2** |
| Corynebacterineae                     | 4.5             | 3.0 | 3.5 | 0.6*  | 3.5  | 4.0  | 1.8 | 2.3   | 1.5 | 3.8 | -   | 5.2  | 7.2 | 13.0** | 9.9**  | 21.1** |
| Mycobacteriaceae                      | 2.6             | -   | 0.6 | -     | -    | -*   | -   | 0.6   | -   | 1.9 | -   | 5.2  | -   | 1.1    | -      | 1.1    |
| <i>Mycobacterium</i>                  | 2.6             | -   | 0.6 | -     | -    | -*   | -   | 0.6   | -   | 1.9 | -   | 5.2  | -   | 1.1    | -      | 1.1    |
| Nocardiaceae                          | 1.9             | 3.0 | 2.9 | 0.6   | 3.5  | 4.0  | 1.8 | 1.7   | 1.5 | 1.9 | -   | -    | 7.2 | 12.0** | 8.6*   | 20.0** |
| <i>Rhodococcus</i>                    | 1.9             | 3.0 | 2.9 | -     | 3.5  | 4.0  | 1.2 | 1.7   | 1.5 | 1.9 | -   | -    | 1.4 | 12.0** | 8.6*   | 20.0** |
| <i>Nocardia</i>                       | -               | -   | -   | 0.6   | -    | -    | 0.6 | -     | -   | -   | -   | -    | -   | -      | -      | -      |
| <i>Smaragdiccoccus</i>                | -               | -   | -   | -     | -    | 1.1  | -   | -     | -   | -   | -   | -    | -   | -      | -      | -      |
| Unclassified                          | -               | -   | -   | -     | -    | -    | -   | -     | -   | -   | -   | -    | -   | -      | -      | -      |
| Corynebacterineae                     | -               | -   | -   | -     | -    | -    | -   | -     | -   | -   | -   | -    | -   | -      | 1.2    | -      |
| Streptomycineae                       | 3.8             | 1.8 | 2.3 | 0.6   | 4.1  | 0.6* | 1.8 | 1.1   | -   | -   | 2.3 | -    | 1.4 | 1.1    | 1.2    | -      |
| Streptomycetaceae                     | 3.8             | 1.8 | 2.3 | 0.6   | 4.1  | 0.6* | 1.8 | 1.1   | -   | -   | 2.3 | -    | 1.4 | 1.1    | 1.2    | -      |
| <i>Streptomyces</i>                   | 3.8             | 1.2 | 2.3 | -*    | 4.1  | 0.6* | 1.2 | 1.1   | -   | -   | 2.3 | -    | 1.4 | 1.1    | 1.2    | -      |
| <i>Kitasatospora</i>                  | -               | 0.6 | -   | 0.6   | -    | -    | -   | -     | -   | -   | -   | -    | -   | -      | -      | -      |
| Unclassified                          | -               | -   | -   | -     | -    | -    | -   | -     | -   | -   | -   | -    | -   | -      | -      | -      |
| Streptomycetaceae                     | -               | -   | -   | -     | -    | -    | 0.6 | -     | -   | -   | -   | -    | -   | -      | -      | -      |
| Propionibacterineae                   | 0.6             | -   | 0.6 | -     | -    | 0.6  | 0.6 | -     | 0.7 | -   | -   | -    | -   | -      | -      | -      |
| Nocardioidaceae                       | 0.6             | -   | -   | -     | -    | 0.6  | 0.6 | -     | 0.7 | -   | -   | -    | -   | -      | -      | -      |
| <i>Nocardioides</i>                   | -               | -   | -   | -     | -    | -    | 0.6 | -     | -   | -   | -   | -    | -   | -      | -      | -      |
| <i>Aeromicrobium</i>                  | 0.6             | -   | -   | -     | -    | -    | -   | -     | 0.7 | -   | -   | -    | -   | -      | -      | -      |
| Unclassified                          | -               | -   | -   | -     | -    | -    | -   | -     | -   | -   | -   | -    | -   | -      | -      | -      |
| Nocarioidaceae                        | -               | -   | -   | -     | -    | 0.6  | -   | -     | -   | -   | -   | -    | -   | -      | -      | -      |
| Probionibacteriaceae                  | -               | -   | 0.6 | -     | -    | -    | -   | -     | -   | -   | -   | -    | -   | -      | -      | -      |
| <i>Propionibacterium</i>              | -               | -   | 0.6 | -     | -    | -    | -   | -     | -   | -   | -   | -    | -   | -      | -      | -      |
| Micrococcineae                        | 1.9             | 4.2 | 1.7 | 2.5   | 2.9  | 2.9  | 1.8 | 4.0   | 0.7 | -   | -   | 3.1  | -   | 1.1    | 2.5    | 2.1    |
| Microbacteriaceae                     | -               | 1.2 | -   | 0.6   | 0.6  | 1.1  | -   | 2.3   | -   | -   | -   | 2.1  | -   | -      | -      | -      |
| <i>Microbacterium</i>                 | -               | -   | -   | 0.6   | -    | -    | -   | 1.1   | -   | -   | -   | 1.0  | -   | -      | -      | -      |
| <i>Leifsonia</i>                      | -               | 1.2 | -   | -     | 0.6  | 0.6  | -   | -     | -   | -   | -   | 1.0  | -   | -      | -      | -      |
| <i>Plantibacter</i>                   | -               | -   | -   | -     | -    | -    | -   | 1.1   | -   | -   | -   | -    | -   | -      | -      | -      |
| Unclassified                          | -               | -   | -   | -     | -    | -    | -   | -     | -   | -   | -   | -    | -   | -      | -      | -      |
| Microbacteriaceae                     | -               | -   | -   | -     | -    | 0.6  | -   | -     | -   | -   | -   | -    | -   | -      | -      | -      |
| Micrococcaceae                        | 1.9             | 3.0 | 1.7 | 1.9   | 2.4  | 1.7  | 1.8 | 1.7   | 0.7 | -   | -   | 1.0  | -   | 1.1    | 2.5    | 2.1    |
| <i>Arthrobacter</i>                   | 1.9             | 3.0 | 1.7 | 1.9   | 2.4  | 1.7  | 1.8 | 1.7   | 0.7 | -   | -   | 1.0  | -   | 1.1    | 1.2    | 2.1    |
| <i>Rhothia</i>                        | -               | -   | -   | -     | -    | -    | -   | -     | -   | -   | -   | -    | -   | -      | 1.2    | -      |
| Streptosporangineae                   | -               | -   | -   | -     | -    | 0.6  | -   | -     | -   | -   | -   | 1.0  | -   | -      | -      | -      |
| Thermomonosporaceae                   | -               | -   | -   | -     | -    | 0.6  | -   | -     | -   | -   | -   | 1.0  | -   | -      | -      | -      |
| <i>Actinocorallia</i>                 | -               | -   | -   | -     | -    | -    | -   | -     | -   | -   | -   | 1.0  | -   | -      | -      | -      |
| Unclassified                          | -               | -   | -   | -     | -    | -    | -   | -     | -   | -   | -   | -    | -   | -      | -      | -      |
| Thermomonosporaceae                   | -               | -   | -   | -     | -    | 0.6  | -   | -     | -   | -   | -   | -    | -   | -      | -      | -      |
| Cautenulisporineae                    | -               | -   | -   | -     | 1.2  | -    | -   | 1.1   | -   | -   | -   | -    | -   | -      | -      | -      |
| Cautenulisporaceae                    | -               | -   | -   | -     | 1.2  | -    | -   | 1.1   | -   | -   | -   | -    | -   | -      | -      | -      |
| <i>Cautenulispora</i>                 | -               | -   | -   | -     | 1.2  | -    | -   | 1.1   | -   | -   | -   | -    | -   | -      | -      | -      |
| Micromonosporineae                    | -               | -   | -   | -     | -    | -    | -   | 0.6   | -   | -   | -   | -    | -   | -      | -      | -      |
| Micromonosporaceae                    | -               | -   | -   | -     | -    | -    | -   | 0.6   | -   | -   | -   | -    | -   | -      | -      | -      |
| <i>Longispora</i>                     | -               | -   | -   | -     | -    | -    | -   | 0.6   | -   | -   | -   | -    | -   | -      | -      | -      |
| Unclassified                          | -               | -   | -   | -     | -    | -    | -   | -     | -   | -   | -   | -    | -   | -      | -      | -      |
| Actinomycetales                       | 0.6             | -   | -   | -     | -    | -    | -   | -     | -   | -   | -   | -    | -   | -      | -      | -      |
| Rubrobacteridae                       | -               | -   | -   | -     | -    | -    | -   | 0.6   | -   | -   | -   | -    | -   | -      | -      | -      |
| Solirubrobacterales                   | -               | -   | -   | -     | -    | -    | -   | 0.6   | -   | -   | -   | -    | -   | -      | -      | -      |
| Unclassified                          | -               | -   | -   | -     | -    | -    | -   | -     | -   | -   | -   | -    | -   | -      | -      | -      |
| Solirubrobacterales                   | -               | -   | -   | -     | -    | -    | -   | 0.6   | -   | -   | -   | -    | -   | -      | -      | -      |
| Acidimicrobiales                      | -               | -   | -   | -     | -    | -    | -   | -     | -   | -   | -   | 1.0  | -   | -      | -      | -      |
| Acidimicrobiales                      | -               | -   | -   | -     | -    | -    | -   | -     | -   | -   | -   | 1.0  | -   | -      | -      | -      |
| Acidimicrobineae                      | -               | -   | -   | -     | -    | -    | -   | -     | -   | -   | -   | 1.0  | -   | -      | -      | -      |
| Unclassified                          | -               | -   | -   | -     | -    | -    | -   | -     | -   | -   | -   | -    | -   | -      | -      | -      |
| Acidimicrobineae                      | -               | -   | -   | -     | -    | -    | -   | -     | -   | -   | -   | 1.0  | -   | -      | -      | -      |
| Unclassified Actinobacteria           | -               | -   | 0.6 | -     | -    | -    | -   | -     | -   | -   | -   | -    | -   | -      | -      | -      |
| Bacteroidetes                         | -               | -   | -   | -     | 1.8  | -    | -   | -     | -   | -   | -   | -    | -   | -      | -      | -      |
| Flavobacteria                         | -               | -   | -   | -     | 1.8  | -    | -   | -     | -   | -   | -   | -    | -   | -      | -      | -      |
| Flavobacteriales                      | -               | -   | -   | -     | 1.8  | -    | -   | -     | -   | -   | -   | -    | -   | -      | -      | -      |
| Flavobacteriaceae                     | -               | -   | -   | -     | 1.8  | -    | -   | -     | -   | -   | -   | -    | -   | -      | -      | -      |
| <i>Flavobacterium</i>                 | -               | -   | -   | -     | 1.8  | -    | -   | -     | -   | -   | -   | -    | -   | -      | -      | -      |
| Chloroflexi                           | 0.6             | -   | -   | 0.6   | -    | 0.6  | -   | -     | -   | -   | -   | -    | -   | -      | -      | -      |
| Ktedonobacteria                       | 0.6             | -   | -   | 0.6   | -    | -    | -   | -     | -   | -   | -   | -    | -   | -      | -      | -      |
| Ktedonobacteriales                    | 0.6             | -   | -   | 0.6   | -    | -    | -   | -     | -   | -   | -   | -    | -   | -      | -      | -      |
| Ktedonobacteraceae                    | -               | -   | -   | 0.6   | -    | -    | -   | -     | -   | -   | -   | -    | -   | -      | -      | -      |
| <i>Ktedonobacter</i>                  | -               | -   | -   | 0.6   | -    | -    | -   | -     | -   | -   | -   | -    | -   | -      | -      | -      |



|                         |      |       |        |        |       |        |       |        |     |        |     |       |       |      |      |       |
|-------------------------|------|-------|--------|--------|-------|--------|-------|--------|-----|--------|-----|-------|-------|------|------|-------|
| Rhizobiaceae            | 3.2  | 6.7   | 13.3** | 15.4** | 8.8*  | 22.3** | 8.5   | 16.9** | 2.2 | 1.9    | 4.7 | -     | 4.3   | 8.7* | 9.9* | 5.3   |
| <i>Rhizobium</i>        | 2.6  | 6.7   | 13.3** | 14.8** | 8.2*  | 21.1** | 7.9*  | 16.4** | 2.2 | 1.9    | 4.7 | -     | 4.3   | 8.7* | 9.9* | 5.3   |
| <i>Kaistia</i>          | 0.6  | -     | -      | 0.6    | 0.6   | 1.1    | 0.6   | 0.6    | -   | -      | -   | -     | -     | -    | -    | -     |
| Methylobacteriaceae     | -    | -     | -      | -      | 0.6   | -      | -     | -      | -   | -      | 2.3 | 6.2** | 7.2** | -    | 2.5  | 3.2   |
| <i>Methylobacterium</i> | -    | -     | -      | -      | 0.6   | -      | -     | -      | -   | -      | 2.3 | 6.2** | 7.2** | -    | 2.5  | 3.2   |
| Hyphomicrobiaceae       | 2.6  | 1.2   | 1.7    | 1.9    | 2.4   | 1.1    | 1.2   | 2.3    | -   | 1.9    | -   | -     | -     | 1.4  | -    | 1.2   |
| <i>Devosia</i>          | 1.9  | 1.2   | 1.7    | 1.9    | 2.4   | 1.1    | 1.2   | 2.3    | -   | -      | -   | -     | -     | 1.4  | -    | 1.2   |
| <i>Hyphomicrobium</i>   | 0.6  | -     | -      | -      | -     | -      | -     | -      | -   | 1.9    | -   | -     | -     | -    | -    | -     |
| Brucellaceae            | 0.6  | -     | -      | 1.2    | 1.2   | 3.4    | -     | 2.3    | -   | -      | -   | -     | -     | -    | -    | -     |
| <i>Ochrobactrum</i>     | 0.6  | -     | -      | 1.2    | 1.2   | 3.4    | -     | 2.3    | -   | -      | -   | -     | -     | -    | -    | -     |
| Xanthobacteraceae       | -    | 0.6   | 0.6    | -      | 0.6   | 1.1    | 0.6   | 0.6    | -   | -      | -   | -     | -     | -    | -    | 1.1   |
| <i>Pseudolabrys</i>     | -    | 0.6   | 0.6    | -      | -     | -      | 0.6   | 0.6    | -   | -      | -   | -     | -     | -    | -    | -     |
| <i>Labrys</i>           | -    | -     | -      | -      | 0.6   | 1.1    | -     | -      | -   | -      | -   | -     | -     | -    | -    | 1.1   |
| Methylocystaceae        | -    | -     | -      | -      | -     | 0.6    | -     | -      | -   | -      | -   | -     | -     | -    | -    | -     |
| <i>Methylocystis</i>    | -    | -     | -      | -      | -     | 0.6    | -     | -      | -   | -      | -   | -     | -     | -    | -    | -     |
| Aurantimonadaceae       | -    | -     | -      | -      | -     | -      | -     | -      | -   | -      | 2.3 | -     | -     | -    | -    | -     |
| <i>Aurantimonas</i>     | -    | -     | -      | -      | -     | -      | -     | -      | -   | -      | 2.3 | -     | -     | -    | -    | -     |
| Unclassified            | -    | -     | -      | -      | -     | -      | -     | -      | -   | -      | -   | -     | -     | -    | -    | -     |
| Rhizobiales             | -    | -     | 1.2    | -      | 1.2   | 0.6    | 0.6   | 1.1    | 0.7 | -      | -   | -     | -     | -    | -    | -     |
| Sphingomonadales        | 0.6  | 3.0   | -      | 4.9*   | 2.4   | 0.6    | -     | 0.1    | 0.7 | 22.6** | 2.3 | -     | 7.2   | -    | -    | 2.1   |
| Sphingomonadaceae       | 0.6  | 3.0   | -      | 4.9*   | 2.4   | 0.6    | -     | -      | 0.7 | 22.6** | 2.3 | -     | 7.2   | -    | -    | 2.1   |
| <i>Novosphingobium</i>  | -    | 0.6   | -      | -      | 0.6   | -      | -     | -      | -   | -      | -   | -     | -     | -    | -    | -     |
| <i>Sphingomonas</i>     | -    | -     | -      | 3.7*   | 0.6   | 0.6    | -     | -      | 0.7 | 22.6** | 2.3 | -     | 7.2   | -    | -    | 2.1   |
| <i>Sphingobium</i>      | -    | 1.2   | -      | 0.6    | -     | -      | -     | -      | -   | -      | -   | -     | -     | -    | -    | -     |
| Unclassified            | -    | -     | -      | -      | -     | -      | -     | -      | -   | -      | -   | -     | -     | -    | -    | -     |
| Sphingomonadaceae       | 0.6  | 1.2   | -      | 0.6    | 1.2   | -      | -     | -      | -   | -      | -   | -     | -     | -    | -    | -     |
| Rhodospirillales        | -    | -     | -      | -      | -     | -      | -     | -      | 0.7 | 1.9    | -   | 0.1   | -     | -    | -    | -     |
| Acetobacteraceae        | -    | -     | -      | -      | -     | -      | -     | -      | 0.7 | 1.9    | -   | 0.1   | -     | -    | -    | -     |
| <i>Roseomonas</i>       | -    | -     | -      | -      | -     | -      | -     | -      | 0.7 | 1.9    | -   | -     | -     | -    | -    | -     |
| <i>Acidisphaera</i>     | -    | -     | -      | -      | -     | -      | -     | -      | -   | -      | -   | 0.1   | -     | -    | -    | -     |
| Unclassified            | -    | -     | -      | -      | -     | -      | -     | -      | -   | -      | -   | -     | -     | -    | -    | -     |
| Alphaproteobacteria     | -    | 0.6   | -      | 0.6    | 2.9   | -      | -     | 0.6    | -   | -      | -   | -     | -     | -    | -    | 1.1   |
| Betaproteobacteria      | 3.2  | 10.3* | 3.5    | 7.4    | 5.9   | 5.7    | 8.5   | 5.6    | 1.5 | 5.7    | -   | 1.0   | -     | 4.3  | 4.9  | 1.1   |
| Burkholderiales         | 3.2  | 9.7*  | 3.5    | 7.4    | 5.9*  | 5.7    | 8.5   | 4.5    | 1.5 | 5.7    | -   | 1.0   | -     | 4.3  | 4.9  | 1.1   |
| Comamonadaceae          | 1.3  | 4.8   | -      | 4.9    | 2.9   | 5.1    | 4.3   | 1.7    | 0.7 | 1.9    | -   | 1.0   | -     | 4.3  | 4.9  | 1.1   |
| <i>Variovorax</i>       | -    | -     | -      | -      | 0.6   | -      | 1.2   | -      | -   | -      | -   | -     | -     | -    | 2.5  | 1.1   |
| <i>Roseateles</i>       | -    | -     | -      | -      | -     | -      | -     | -      | -   | -      | -   | -     | -     | -    | -    | -     |
| <i>Polaromonas</i>      | 0.6  | 3.0   | -      | 1.9    | 0.6   | 4.0    | 2.4   | 1.1    | -   | 1.9    | -   | -     | -     | 3.3  | 2.5  | -     |
| <i>Comamonas</i>        | -    | 1.8   | -      | 3.1*   | 1.8   | 0.6    | 0.6   | 0.6    | -   | -      | -   | 1.0   | -     | -    | -    | -     |
| <i>Delftia</i>          | 0.6  | -     | -      | -      | -     | -      | -     | -      | -   | -      | -   | -     | -     | -    | -    | -     |
| <i>Acidovorax</i>       | -    | -     | -      | -      | -     | -      | -     | -      | 0.7 | -      | -   | -     | -     | -    | -    | -     |
| Unclassified            | -    | -     | -      | -      | -     | -      | -     | -      | -   | -      | -   | -     | -     | -    | -    | -     |
| Comamonadaceae          | -    | -     | -      | -      | -     | 0.6    | -     | -      | -   | -      | -   | -     | -     | 1.1  | -    | -     |
| Oxalobacteraceae        | 1.3  | 1.2   | 0.6    | 1.2    | -     | -      | 1.2   | 1.1    | 0.7 | 3.8    | -   | -     | -     | -    | -    | -     |
| <i>Collimonas</i>       | -    | 1.2   | -      | -      | -     | -      | -     | -      | -   | -      | -   | -     | -     | -    | -    | -     |
| <i>Herbaspirillum</i>   | 1.3  | -     | -      | 1.2    | -     | -      | -     | 0.6    | 0.7 | -      | -   | -     | -     | -    | -    | -     |
| Unclassified            | -    | -     | -      | -      | -     | -      | -     | -      | -   | -      | -   | -     | -     | -    | -    | -     |
| Oxalobacteraceae        | -    | -     | 0.6    | -      | -     | -      | 1.2   | 0.6    | -   | 3.8    | -   | -     | -     | -    | -    | -     |
| Alcaligenaceae          | 0.6  | 2.4   | 1.7    | -      | -     | -      | 1.2   | 1.1    | -   | -      | -   | -     | -     | -    | -    | -     |
| <i>Pusillimonas</i>     | -    | 1.2   | -      | -      | -     | -      | 0.6   | -      | -   | -      | -   | -     | -     | -    | -    | -     |
| <i>Achromobacter</i>    | -    | -     | 0.6    | -      | -     | -      | 0.6   | -      | -   | -      | -   | -     | -     | -    | -    | -     |
| Unclassified            | -    | -     | -      | -      | -     | -      | -     | -      | -   | -      | -   | -     | -     | -    | -    | -     |
| Alcaligenaceae          | 0.6  | 1.2   | 1.2    | -      | -     | -      | 0.0   | 1.1    | -   | -      | -   | -     | -     | -    | -    | -     |
| Burkholderiaceae        | -    | 1.2   | 1.2    | 1.2    | 2.9   | 0.6    | 1.2   | 0.6    | -   | -      | -   | -     | -     | -    | -    | -     |
| <i>Pandoraea</i>        | -    | 0.6   | -      | -      | -     | -      | 0.6   | -      | -   | -      | -   | -     | -     | -    | -    | -     |
| <i>Burkholderia</i>     | -    | 0.6   | 1.2    | 1.2    | 1.8   | 0.6    | 0.6   | 0.6    | -   | -      | -   | -     | -     | -    | -    | -     |
| <i>Ralstonia</i>        | -    | -     | -      | -      | 0.6   | -      | -     | -      | -   | -      | -   | -     | -     | -    | -    | -     |
| <i>Cupriavidus</i>      | -    | -     | -      | -      | 0.6   | -      | -     | -      | -   | -      | -   | -     | -     | -    | -    | -     |
| Unclassified            | -    | -     | -      | -      | -     | -      | -     | -      | -   | -      | -   | -     | -     | -    | -    | -     |
| Burkholderiales         | -    | -     | -      | -      | -     | -      | 0.6   | -      | -   | -      | -   | -     | -     | -    | -    | -     |
| <i>Shinella</i>         | -    | -     | -      | -      | -     | -      | -     | 0.6    | -   | -      | -   | -     | -     | -    | -    | -     |
| Unclassified            | -    | -     | -      | -      | -     | -      | -     | -      | -   | -      | -   | -     | -     | -    | -    | -     |
| Betaproteobacteria      | -    | 0.6   | -      | -      | -     | -      | -     | 0.6    | -   | -      | -   | -     | -     | -    | -    | -     |
| Gammaproteobacteria     | 33.3 | 35.2  | 37.0   | 37.0   | 28.2  | 19.4** | 27.4  | 24.3   | 5.9 | 7.6    | 4.7 | 6.2   | 7.2   | 3.3  | 2.5  | 15.8* |
| Legionellales           | 18.6 | 16.4  | 10.4*  | 13.0   | 7.6** | 10.9*  | 12.2* | 7.3**  | 0.7 | 1.9    | -   | 3.1   | -     | 1.1  | -    | -     |
| Coxiellaceae            | 18.6 | 15.8  | 9.2*   | 13.0   | 7.1** | 9.1*   | 8.5** | 6.8**  | -   | 1.9    | -   | 3.1   | -     | 1.1  | -    | -     |
| <i>Aquicella</i>        | 18.6 | 15.8  | 9.2*   | 13.0   | 7.1** | 9.1*   | 7.9** | 6.8**  | -   | 1.9    | -   | 3.1   | -     | 1.1  | -    | -     |
| <i>Coxiella</i>         | -    | -     | -      | -      | -     | -      | 0.6   | -      | -   | -      | -   | -     | -     | -    | -    | -     |
| Legionellaceae          | -    | -     | 1.2    | -      | 0.6   | 1.7    | 3.7*  | 0.6    | 0.7 | -      | -   | -     | -     | -    | -    | -     |
| <i>Legionella</i>       | -    | -     | 1.2    | -      | 0.6   | 1.7    | 3.7   | 0.6    | 0.7 | -      | -   | -     | -     | -    | -    | -     |
| Enterobacteriales       | -    | 2.4   | 4.6**  | 8.6**  | 5.3** | 1.1    | 1.2   | 5.1**  | -   | -      | -   | 1.0   | -     | -    | -    | -     |
| Enterobacteriaceae      | -    | 2.4   | 4.6**  | 8.6**  | 5.3** | 1.1    | 1.2   | 5.1**  | -   | -      | -   | 1.0   | -     | -    | -    | -     |
| <i>Serratia</i>         | -    | 0.6   | -      | -      | 0.6   | -      | -     | -      | -   | -      | -   | -     | -     | -    | -    | -     |
| <i>Enterobacter</i>     | -    | 1.2   | 1.2    | 1.2    | -     | -      | -     | 0.6    | -   | -      | -   | -     | -     | -    | -    | -     |
| <i>Citrobacter</i>      | -    | -     | 1.7    | -      | -     | -      | -     | -      | -   | -      | -   | -     | -     | -    | -    | -     |
| <i>Pantoea</i>          | -    | -     | 0.6    | 3.1*   | 1.2   | -      | 0.6   | -      | -   | -      | -   | -     | -     | -    | -    | -     |
| <i>Erwinia</i>          | -    | -     | -      | -      | 1.8   | -      | -     | -      | -   | -      | -   | -     | -     | -    | -    | -     |

|                         |      |       |      |       |       |      |      |      |     |      |     |     |     |     |     |        |
|-------------------------|------|-------|------|-------|-------|------|------|------|-----|------|-----|-----|-----|-----|-----|--------|
| <i>Pectobacterium</i>   | -    | -     | -    | -     | 1.2   | 0.6  | -    | 2.3  | -   | -    | -   | -   | -   | -   | -   | -      |
| <i>Yersinia</i>         | -    | -     | -    | -     | -     | -    | 0.6  | -    | -   | -    | -   | -   | -   | -   | -   | -      |
| Unclassified            |      |       |      |       |       |      |      |      |     |      |     |     |     |     |     |        |
| Enterobacteriaceae      | -    | 0.6   | 1.2  | 4.3   | 0.6   | 0.6  | 0.0  | 2.3  | -   | -    | -   | 1.0 | -   | -   | -   | -      |
| Pseudomonadales         | -    | 2.4   | 3.5* | 4.9** | 6.5** | 1.7  | 1.2  | 3.4* | 0.7 | 5.7* | 4.7 | -   | 4.3 | -   | 1.2 | 14.7** |
| Moraxellaceae           | -    | -     | -    | 2.5   | 5.3** | 0.6  | -    | 0.6  | -   | -    | -   | -   | -   | -   | -   | 10.5** |
| <i>Acinetobacter</i>    | -    | -     | -    | 2.5   | 5.3** | 0.6  | -    | 0.6  | -   | -    | -   | -   | -   | -   | -   | -      |
| <i>Enhydrobacter</i>    | -    | -     | -    | -     | -     | -    | -    | -    | -   | -    | -   | -   | -   | -   | -   | 10.5** |
| Pseudomonadaceae        | -    | 2.4   | 3.5* | 2.5   | 1.2   | 1.1  | 1.2  | 2.8* | 0.7 | 5.7* | 4.7 | -   | 4.3 | -   | 1.2 | 4.2    |
| <i>Pseudomonas</i>      | -    | 2.4   | 3.5* | 2.5   | 1.2   | 1.1  | 1.2  | 2.8* | 0.7 | 5.7* | 4.7 | -   | 4.3 | -   | 1.2 | 4.2    |
| <i>Rhizobacter</i>      | -    | -     | -    | -     | -     | -    | -    | -    | -   | -    | -   | -   | -   | -   | -   | -      |
| Xantomonadales          | 1.3  | 4.2   | 0.6  | 1.2   | 4.7   | 0.6  | 1.2  | 2.8  | 4.4 | -    | -   | 1.0 | 1.4 | 1.1 | -   | .*     |
| Xantomonadaceae         | 1.3  | 4.2   | 0.6  | 1.2   | 4.7   | 0.6  | 1.2  | 2.8  | 4.4 | -    | -   | 1.0 | 1.4 | 1.1 | -   | .*     |
| <i>Rudaea</i>           | 0.6  | 1.2   | -    | -     | -     | 0.6  | 1.2  | -    | -   | -    | -   | -   | -   | -   | -   | -      |
| <i>Stenotrophomonas</i> | -    | -     | 0.6  | -     | 0.6   | -    | -    | 0.6  | 4.4 | -    | -   | -   | 1.4 | -   | -   | .*     |
| <i>Dokdonella</i>       | -    | -     | -    | -     | -     | -    | -    | 0.6  | -   | -    | -   | -   | -   | -   | -   | -      |
| <i>Rhodanobacter</i>    | 0.6  | 1.8   | -    | 1.2   | 1.8   | -    | -    | 1.1  | -   | -    | -   | -   | -   | -   | -   | -      |
| <i>Lysobacter</i>       | -    | 1.2   | -    | -     | 1.8   | -    | -    | -    | -   | -    | -   | 1.0 | -   | 1.1 | -   | -      |
| <i>Luteibacter</i>      | -    | -     | -    | -     | -     | -    | -    | 0.6  | -   | -    | -   | -   | -   | -   | -   | -      |
| Unclassified            |      |       |      |       |       |      |      |      |     |      |     |     |     |     |     |        |
| Xanthomonadaceae        | -    | -     | -    | -     | 0.6   | -    | -    | -    | -   | -    | -   | -   | -   | -   | -   | -      |
| Thiotrichales           | 0.6  | -     | 0.6  | -     | -     | -    | 0.6  | 0.6  | -   | -    | -   | -   | -   | -   | -   | -      |
| Thiotrichales           |      |       |      |       |       |      |      |      |     |      |     |     |     |     |     |        |
| incertae sedis          | -    | -     | -    | -     | -     | -    | 0.6  | -    | -   | -    | -   | -   | -   | -   | -   | -      |
| Unclassified            |      |       |      |       |       |      |      |      |     |      |     |     |     |     |     |        |
| thiotrichales           | 0.6  | -     | 0.6  | -     | -     | -    | -    | 0.6  | -   | -    | -   | -   | -   | -   | -   | -      |
| Chromatiales            | -    | -     | 0.6  | -     | -     | -    | -    | -    | -   | -    | -   | -   | -   | -   | -   | -      |
| Unclassified            |      |       |      |       |       |      |      |      |     |      |     |     |     |     |     |        |
| Chromatiales            | -    | -     | 0.6  | -     | -     | -    | -    | -    | -   | -    | -   | -   | -   | -   | -   | -      |
| Unclassified            |      |       |      |       |       |      |      |      |     |      |     |     |     |     |     |        |
| Gammaproteobacteria     | 12.8 | 9.7   | 16.8 | 9.3   | 4.1   | 5.1  | 11.0 | 5.1  | -   | -    | -   | 1.0 | 1.4 | 1.1 | 1.2 | 1.1    |
| Deltaproteobacteria     | 6.4  | 0.6** | 5.8  | 1.2*  | 1.2*  | 1.1* | 7.3  | 5.6  | -   | 1.9  | -   | 1.0 | -   | -   | -   | -      |
| Myxococcales            | 5.8  | 0.6** | 5.8  | 1.2*  | 1.2*  | 1.1* | 6.7  | 5.6  | -   | -    | -   | -   | -   | -   | -   | -      |
| Cystobacterineae        | 5.1  | 0.6*  | 5.8  | 1.2   | 1.2*  | 1.1* | 6.7  | 5.6  | -   | -    | -   | -   | -   | -   | -   | -      |
| Unclassified            |      |       |      |       |       |      |      |      |     |      |     |     |     |     |     |        |
| Cystobacterineae        | 5.1  | 0.6   | 1.2  | -     | 1.2   | 1.1  | 6.7  | 5.6  | -   | -    | -   | -   | -   | -   | -   | -      |
| Sorangiineae            | 0.6  | -     | -    | -     | -     | -    | -    | -    | -   | -    | -   | -   | -   | -   | -   | -      |
| Unclassified            |      |       |      |       |       |      |      |      |     |      |     |     |     |     |     |        |
| Sorangiineae            | 0.6  | -     | -    | -     | -     | -    | -    | -    | -   | -    | -   | -   | -   | -   | -   | -      |
| Bdellovibrionales       | -    | -     | -    | -     | -     | -    | 0.6  | -    | -   | -    | -   | -   | -   | -   | -   | -      |
| Bdellovibrionaceae      | -    | -     | -    | -     | -     | -    | 0.6  | -    | -   | -    | -   | -   | -   | -   | -   | -      |
| <i>Bdellovibrio</i>     | -    | -     | -    | -     | -     | -    | 0.6  | -    | -   | -    | -   | -   | -   | -   | -   | -      |
| Unclassified            |      |       |      |       |       |      |      |      |     |      |     |     |     |     |     |        |
| Deltaproteobacteria     | 0.6  | -     | -    | -     | -     | -    | -    | -    | -   | 1.9  | -   | 1.0 | -   | -   | -   | -      |
| Unclassified            |      |       |      |       |       |      |      |      |     |      |     |     |     |     |     |        |
| Proteobacteria          | 1.3  | -     | -    | 0.6   | 0.6   | 0.0  | 1.8  | -    | 0.7 | -    | -   | -   | 1.4 | -   | 1.2 | -      |
| Verrucomicrobia         | 1.3  | 1.8   | 1.2  | 0.0   | 3.5   | 5.7* | 3.7  | 4.0  | -   | -    | -   | -   | -   | 2.2 | -   | -      |
| Spartobacteria          | 0.6  | 1.2   | -    | -     | 1.8   | 4.6* | 1.8  | 2.3  | -   | -    | -   | -   | -   | 2.2 | -   | -      |
| Spartobacteria          |      |       |      |       |       |      |      |      |     |      |     |     |     |     |     |        |
| genera incertae sedis   | 0.6  | 1.2   | -    | -     | 1.8   | 4.6* | 1.8  | 2.3  | -   | -    | -   | -   | -   | 2.2 | -   | -      |
| Opitutae                | 0.6  | 0.6   | 1.2  | -     | -     | 0.6  | 1.2  | 1.1  | -   | -    | -   | -   | -   | -   | -   | -      |
| Puniceococcales         | 0.6  | 0.6   | 1.2  | -     | -     | 0.6  | 1.2  | 1.1  | -   | -    | -   | -   | -   | -   | -   | -      |
| Puniceococcaceae        | 0.6  | 0.6   | 1.2  | -     | -     | 0.6  | 1.2  | 1.1  | -   | -    | -   | -   | -   | -   | -   | -      |
| Unclassified            |      |       |      |       |       |      |      |      |     |      |     |     |     |     |     |        |
| Puniceococcaceae        | 0.6  | 0.6   | 1.2  | -     | -     | 0.6  | 1.2  | 1.1  | -   | -    | -   | -   | -   | -   | -   | -      |
| Verrucomicrobiae        | -    | -     | -    | -     | 1.8   | 0.6  | -    | -    | -   | -    | -   | -   | -   | -   | -   | -      |
| Verrucomicrobiales      | -    | -     | -    | -     | 1.8   | 0.6  | -    | -    | -   | -    | -   | -   | -   | -   | -   | -      |
| Verrucomicrobiaceae     | -    | -     | -    | -     | 1.8   | 0.6  | -    | -    | -   | -    | -   | -   | -   | -   | -   | -      |
| <i>Luteolibacter</i>    | -    | 6.0   | -    | -     | -     | 0.6  | -    | -    | -   | -    | -   | -   | -   | -   | -   | -      |
| <i>Verrucomicrobium</i> | 0.6  | -     | -    | -     | 0.6   | -    | -    | -    | -   | -    | -   | -   | -   | -   | -   | -      |
| <i>Prostheco bacter</i> | 1.2  | -     | -    | -     | 1.2   | -    | -    | -    | -   | -    | -   | -   | -   | -   | -   | -      |
| Unclassified            |      |       |      |       |       |      |      |      |     |      |     |     |     |     |     |        |
| Verrucomicrobia         | -    | -     | -    | -     | -     | -    | 0.6  | 0.6  | -   | -    | -   | -   | -   | -   | -   | -      |
| Bacteria_incertae_sedis | -    | -     | -    | 0.6   | 1.8   | 0.6  | -    | -    | -   | -    | -   | -   | -   | -   | -   | -      |
| Unclassified Bacteria   | 1.9  | 1.2   | 1.2  | -     | -     | 1.7  | 2.4  | 0.6  | 0.7 | -    | 4.7 | 1.0 | -   | 2.2 | -   | -      |

\*Sequences were grouped using the RDP Classifier of the Ribosomal Database Project-II release 11 with a confidence threshold of 80%.

<sup>b</sup>R, M and S stand for phenotypes of potato 8 genotypes which are resistant, medium resistant and susceptible to potato scab diseases, respectively. R1, R2, R3, M1, M2, S1, S2 and S3 are designated for clone libraries of 8 potato genotypes (Yukirasha, 02005-10, Snow March, Star Rubi, Snowden, Irish Cobbler, Toyoshiro, and Piruka, respectively). CD stands for the isolate collections derived \* and \*\* indicate statistical significance at the 5% and 1% levels ( $P < 0.05$  and  $P < 0.01$ ), respectively, based on the results of Fisher's exact test between R1 and other libraries.













Supplementary Table 3A. Statistical significance for the abundance of the genus *Aquicella* among roots of 8 genotypes of potato plants

|    | R2 <sup>a</sup> | R3 | M1 | M2 | S1 | S2 | S3 |
|----|-----------------|----|----|----|----|----|----|
| R1 | -               | *  | -  | ** | *  | ** | ** |
| R2 |                 | -  | -  | *  | -  | *  | ** |
| R3 |                 |    | -  | -  | -  | -  | -  |
| M1 |                 |    |    | -  | -  | -  | -  |
| M2 |                 |    |    |    | -  | -  | -  |
| S1 |                 |    |    |    |    | -  | -  |
| S2 |                 |    |    |    |    |    | -  |

Supplementary Table 3B. Statistical significance for the abundance of the genus *Rhodococcus* among tubers of 8 genotypes of potato plants

|    | R2 <sup>a</sup> | R3 | M1 | M2 | S1 | S2 | S3 |
|----|-----------------|----|----|----|----|----|----|
| R1 | -               | -  | -  | -  | ** | ** | ** |
| R2 |                 | -  | -  | -  | *  | -  | ** |
| R3 |                 |    | -  | -  | *  | -  | ** |
| M1 |                 |    |    | -  | ** | ** | ** |
| M2 |                 |    |    |    | *  | -  | ** |
| S1 |                 |    |    |    |    | -  | -  |
| S2 |                 |    |    |    |    |    | *  |

\* and \*\* indicate statistical significance at the 5% and 1% levels ( $P < 0.05$  and  $P < 0.01$ ), respectively, calculated with the Library Compare  
<sup>a</sup>R, M and S stand for phenotypes of potato 8 genotypes which are resistant, medium resistant and susceptible to potato scab diseases, respectively. R1, R2, R3, M1, M2, S1, S2 and S3 are designated for clone libraries of 8 potato genotypes (Yukirasha, 02005-10, Snow March, Star Ruby, Snowden, Irish Cobbler, Toyoshiro, and Piruka,

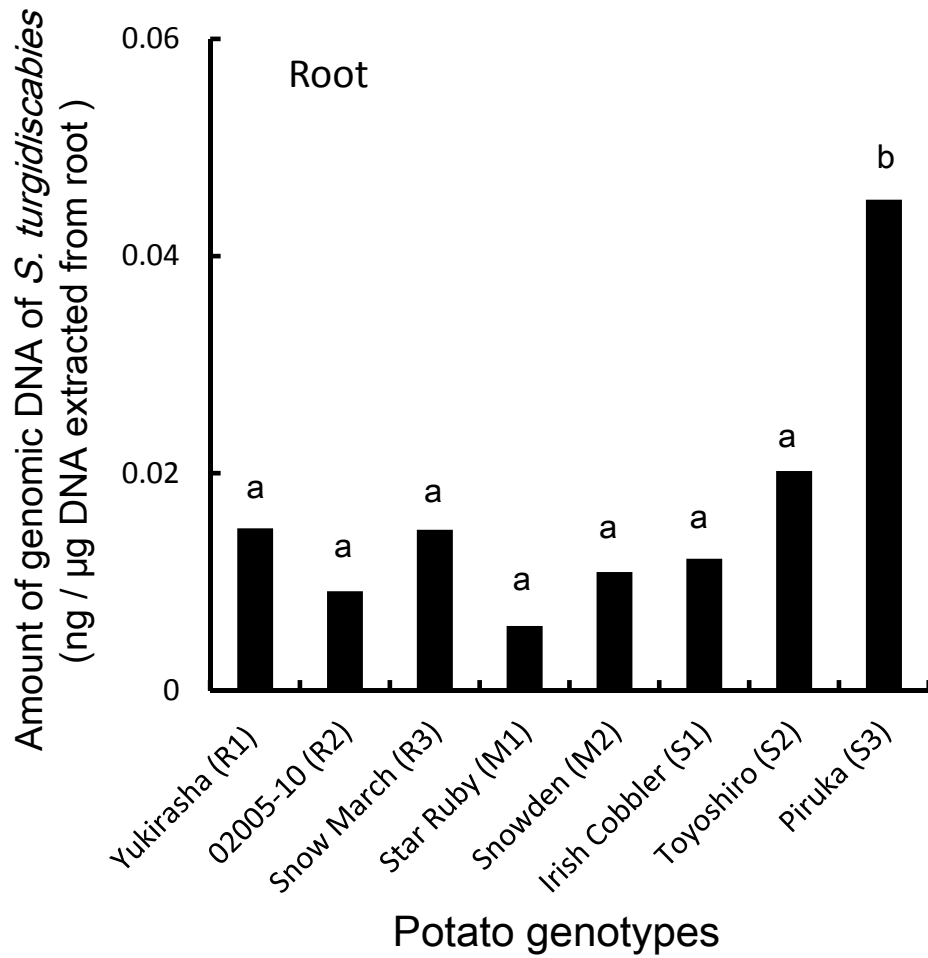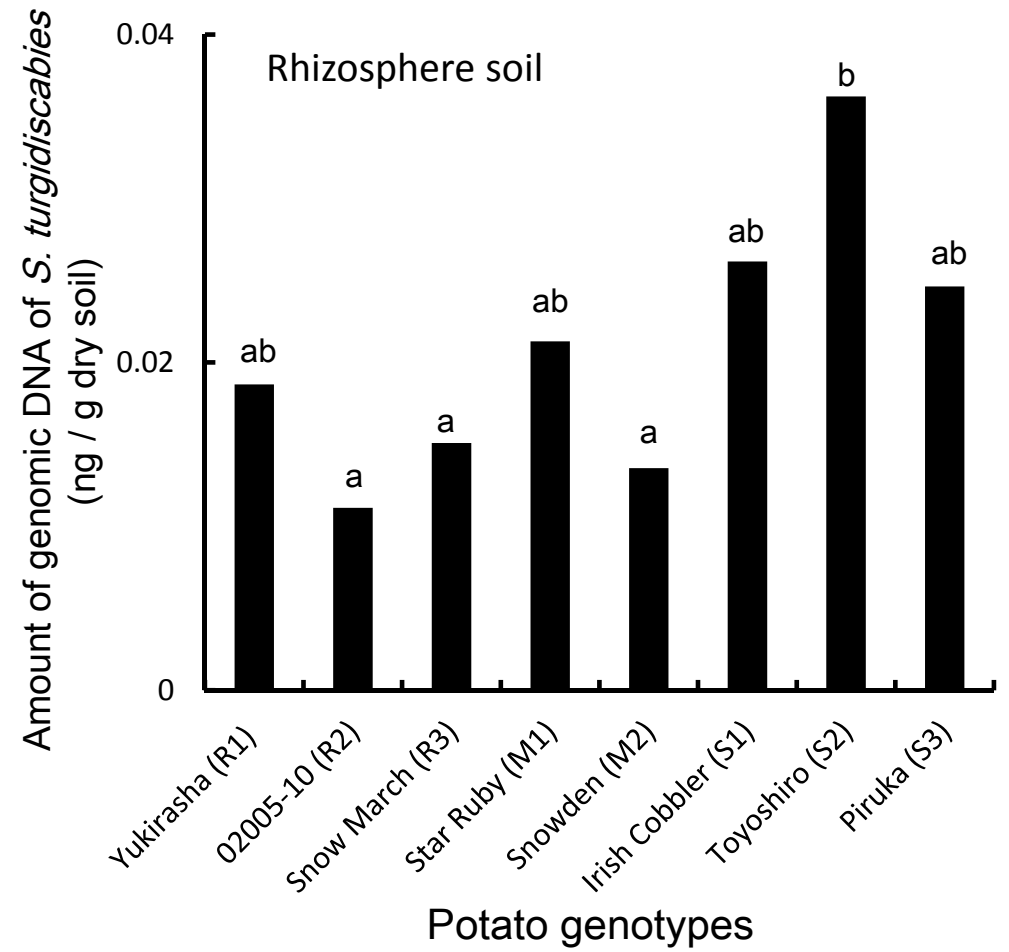

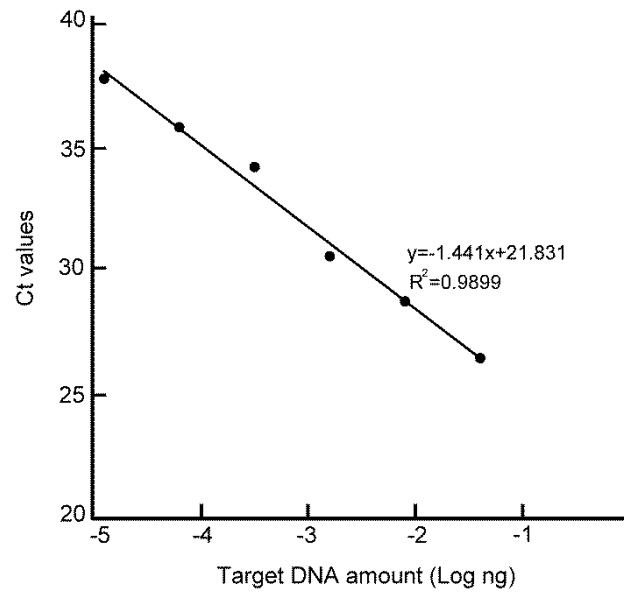

Fig.S2
